# Supplementary material for: CD276-dependent efferocytosis by tumor-associated macrophages promotes immune evasion in bladder cancer
Source: PubMed Central journal article supplement (PMC10985117; doi:10.1038/s41467-024-46735-5), 2024-04-01
Supplement: 41467_2024_46735_MOESM3_ESM.pdf [file 41467_2024_46735_MOESM3_ESM.pdf]

### **Description of Additional Supplementary Files**

Supplementary Data 1: 93 tumor tissue specimens from BLCA patients who underwent surgical treatment at the Fourth Medical Center of PLA General Hospital.

Supplementary Data 2 a commercial tissue microarray containing 63 BLCA and 16 para-tumor tissues from Shanghai OUTDO BIOTECH Co., Ltd.

Supplementary Data 3: Differential gene analysis revealed 39 up-regulated genes and 99 down-regulated genes in CD276-wko epithelial cells.

Supplementary Data 4: Differential expression genes (DEGs) in TAMs after CD276 ablation were identified by pseudobulk analysis. 331 up-regulated genes and 492 down-regulated genes were identified in CD276 cKO-TAMs compared to the control group.

Supplementary Data 5: Evaluation of the AUC score of each potential factor by SCENIC analysis for determination of the transcriptional activity of transcription factors in TAMs.

Supplementary Data 6: list of primers used for this manuscript.
